# Supplementary material
Source: PubMed Central journal article supplement (PMC7747379)
Supplement: 12889_2020_10048_MOESM1_ESM.pdf [file 12889_2020_10048_MOESM1_ESM.pdf]

**COCONEL Survey, 1<sup>st</sup> Wave.**

**A. Living & housing conditions.**

**Q1. How do you pull through with you household's income?**

- It's very hard
- It's hard
- Easily
- Very easily

*If 'very hard' or 'hard'*

**Q2. Is it because income losses due to the lockdown?**

- Strongly agree
- Somewhat agree
- Somewhat disagree
- Strongly disagree

*For economically active people*

**Q3. Are you currently still working?**

- 1 Yes, full-time work outside home
- 1 Yes, part-time work outside home
- 2 Yes, I am teleworking
- 3 No, I stopped working due to the lockdown
- 4 No, I am looking for a job

**Q4. There are currently X people living in your household. How old are they?**

**Q5. Are you currently living.....?**

- 1 In your usual home
- 2 In your second home
- 3 At a relative's place
- 4. At a friend's place
- 5. Other (specify)

**Q6. And the place where you are currently living is...?**

- 1 An individual house
- 2 An apartment

- 3 An independent room with its own entrance
- 4 Other (specify)

**Q7. What is approximately the total surface area of this place (in square meters)?**

**Q8. How many rooms are there in this place?**

**Q9. In this place, is there...? (Yes/No)**

- 1 A balcony
- 2 A terrace
- 3 A garden or a plot of land
- 4 A courtyard

*For each 'Yes' response to Q9*

**Q10. Do you share this balcony / terrace... with other households?**

- Yes
- No

## B. Health Status

**Q11. Generally speaking, how is your health now?**

- 1 Very good
- 2 Rather good
- 3 Rather bad
- 4 Very bad

**Q12. Are you currently living with a chronic condition which requires medical care (example: diabetes, cardiac or respiratory disease...)?**

*Instructions: do not take into account temporary conditions, such as flu.*

- 1 Yes. Wich one(s)? (specify))
- 2 No
- 3 I don't know

**Q13 Last winter (2019-2020), did you get vaccinated against the seasonal flu?**

Yes/No

**Q14/15. During the past month, how much of the time...: (one response per line)**

|  |                 |                  |               |                  |                      |                  |
|--|-----------------|------------------|---------------|------------------|----------------------|------------------|
|  | All of the time | Most of the time | A good bit of | Some of the time | A little of the time | None of the time |
|--|-----------------|------------------|---------------|------------------|----------------------|------------------|

|                                                                        | the time       |                |                |                |                |                |
|------------------------------------------------------------------------|----------------|----------------|----------------|----------------|----------------|----------------|
| ...have you been a very nervous person?                                | ☐ <sub>1</sub> | ☐ <sub>2</sub> | ☐ <sub>3</sub> | ☐ <sub>4</sub> | ☐ <sub>5</sub> | ☐ <sub>6</sub> |
| ...have you felt so down in the dumps that nothing could cheer you up? | ☐ <sub>1</sub> | ☐ <sub>2</sub> | ☐ <sub>3</sub> | ☐ <sub>4</sub> | ☐ <sub>5</sub> | ☐ <sub>6</sub> |
| ...have you felt calm and peaceful?                                    | ☐ <sub>1</sub> | ☐ <sub>2</sub> | ☐ <sub>3</sub> | ☐ <sub>4</sub> | ☐ <sub>5</sub> | ☐ <sub>6</sub> |
| ...have you felt downhearted and blue?                                 | ☐ <sub>1</sub> | ☐ <sub>2</sub> | ☐ <sub>3</sub> | ☐ <sub>4</sub> | ☐ <sub>5</sub> | ☐ <sub>6</sub> |
| ...were you a happy person?                                            | ☐ <sub>1</sub> | ☐ <sub>2</sub> | ☐ <sub>3</sub> | ☐ <sub>4</sub> | ☐ <sub>5</sub> | ☐ <sub>6</sub> |

**Q16. How do you describe your present condition?**

- 1 I am / have been infected with the novel coronavirus (medically confirmed)
- 2 I have symptoms of it, but it is not confirmed
- 3 I have no symptom, but I have been in contact with an infected person
- 4 I have no symptom and I don't think I have been infected

**Q17. And within your household, is there a confirmed case of the novel coronavirus?**

- 1 No
- 2 No, but someone has symptoms
- 3 No, but someone has been in contact with an infected person
- 4 Yes, someone has been tested positive to the novel coronavirus

**Q18. Among your relatives (family, friends), has some vbeen infected by the novel coronavirus?**

- 1 Yes, several of them have been tested positive
- 2 Yes, one of them have been tested positive
- 3 No, but a least one has symmptoms
- 4 No

**C. Socialisation & isolation**

**Q19. The day before, how many times did you get out of your housing?**

*Instruction: going to the garden or on the balcony does not count...*

- I stayed at home
- once
- twice
- more often

*If at least 'once'*

**Q20. The day before, how much time (approximately) did you spend out of your housing? (specify how many hours and minutes)**

*If at least 'once'*

**Q21. For which motives did you get out (several responses available): (random order)**

- For work
- For shopping
- For a walk
- For doing sports
- To help a kin/a friend
- To go to the pharmacy
- To go to a medical appointment

**Q22. And the day before, did a person from outside your household visit you?**

- Yes, one visit
- Yes, several visits
- No

**Q23. The day before, how much time did you spent on your phone (SMS do not count)?**

**Q24. And how many people did you talk to?**

**Q25. The day before, how much time did you spent chatting with other people on the social media (SMS, Insta, Whatsapp...)?**

**Q26. And how many people did you chat with?**

#### **D. Perceptions of the Covid-19**

**Q27. If a vaccine becomes available, would you get it?**

- Yes, certainly
- Yes, probably
- Probably not
- Certainly Not

**Q28-30. The following statements deal with the current lockdown. Please now give your opinion on each of them (random order).**

**The lockdown...**

**...is the only effective way to fight the epidemic**

**...is disproportionate considering the real severity of the epidemic**

**...causes too much restriction on civil liberties**

**...should last several more weeks to be effective**

**...should be strengthened to be effective**

**...should be less coercive to be more acceptable**

**...will cause family tragedies**

**...has already disastrous economic consequences**

**...is the consequence of the lack of hospital resources**

**...could have been avoided by the widespread wearing of masks**

**...could be replaced by mass screening tests**

**...is an opportunity to develop local solidarity**

Strongly agree / somewhat agree / somewhat disagree / strongly disagree

**Q31. According to you, when will the covid-19 pandemic end?**

\_\_\_ months & \_\_\_ weeks
